# Supplementary material for: Carbon Nanotube-Modified Nickel Hydroxide as Cathode Materials for High-Performance Li-S Batteries
Source: MDPI journal article supplement (doi:10.3390/nano12050886), 2022-03-07
Supplement: s1 [file s1]

Supporting Information

# Carbon Nanotube-Modified Nickel Hydroxide as Cathode Materials for High-Performance Li-S Batteries

Qianwen Jin <sup>1</sup>, Yajing Yan <sup>1</sup>, Chenchen Hu <sup>1</sup>, Yongguang Zhang <sup>1,\*</sup>, Xi Wang <sup>2,\*</sup> and Chunyong Liang <sup>1,\*</sup>

<sup>1</sup> State Key Laboratory of Reliability and Intelligence of Electrical Equipment, Hebei University of Technology, Tianjin 300130, China; jinqianwen111@163.com (Q.J.); yajingy@126.com (Y.Y.); h15364966537@163.com (C.H.)

<sup>2</sup> China Center for Information Industry Development, Beijing 100048, China

\* Correspondence: yongguangzhang@hebut.edu.cn (Y.Z.); liangchunyong@hebut.edu.cn (C.L.); wangxi@ccid-thinktank.com (X.W.)

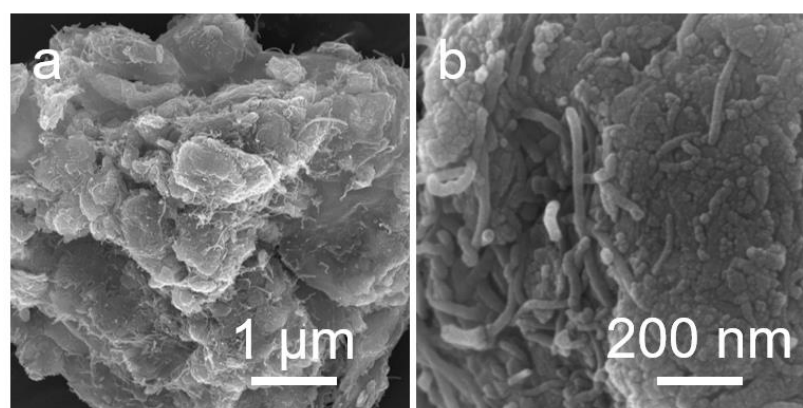

**Figure S1.** SEM images of S/Ni(OH)<sub>2</sub>@CNT.

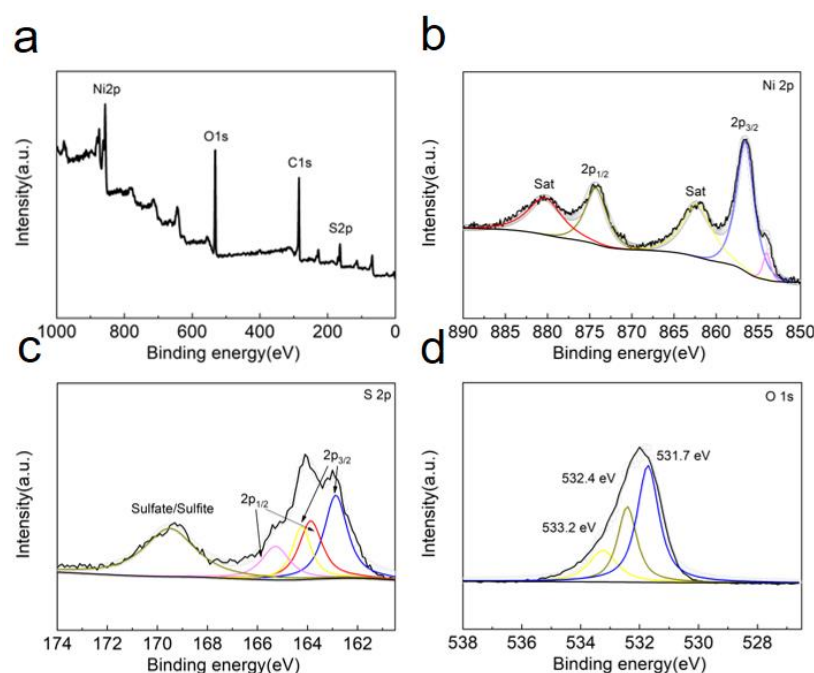

**Figure S2.** (a) XPS survey and high-resolution (b) Ni 2p, (c) S 2p, and (d) O 1s spectra of S/Ni(OH)<sub>2</sub>@CNT.

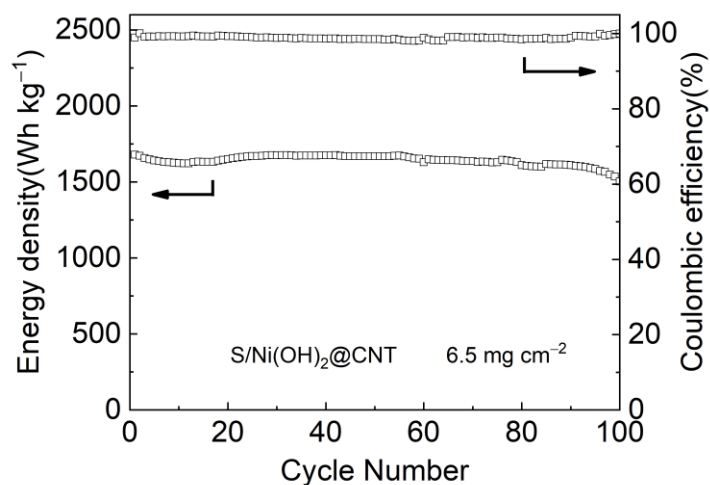

**Figure S3.** Energy density of S/Ni(OH)<sub>2</sub>@CNT cathode with high sulfur loading of 6.5 mg cm<sup>-2</sup> at 0.2 C.

**Table S1.** Sulfur loading comparison of S/Ni(OH)<sub>2</sub>@CNT with previously reported S/C cathodes.

| Samples                       | Weight Ratio (S:Samples) | Sulfur Content (%) | Ref.             |
|-------------------------------|--------------------------|--------------------|------------------|
| DIB@CNT                       | 3:1                      | 67.0               | [1]              |
| CNT/ CPO/CPNC-1               | 7:3                      | 70.0               | [2]              |
| CNTs                          | 5:1                      | 78.0               | [3]              |
| CNT@UIO66-SH                  | 3:1                      | 60.0               | [4]              |
| CCB                           | 3:2                      | 59.3               | [5]              |
| MgAl-LDH@CNT                  | 9:11                     | 55.0               | [6]              |
| CNTs/(Ni-P)                   | 7:3                      | 70.8               | [7]              |
| <b>Ni(OH)<sub>2</sub>@CNT</b> | <b>3:1</b>               | <b>74.6</b>        | <b>This work</b> |

**Table S2.** Performance comparison among different C-based sulfur electrodes.

| Samples                         | Initial Capacity (mAh g <sup>-1</sup> )/rate | Areal Capacity (mAh cm <sup>-2</sup> ) | Cycle      | S Loading (mg cm <sup>-2</sup> ) | Ref.             |
|---------------------------------|----------------------------------------------|----------------------------------------|------------|----------------------------------|------------------|
| NSHC/S                          | 1586/0.1C                                    | 4.07                                   | 100        | 6.72                             | [8]              |
| S-C@S                           | 958/0.1C                                     | 1.72                                   | 200        | 2.9                              | [9]              |
| CP/Fe-N-GMOC/S                  | 1473/0.2C                                    | 5                                      | 120        | 6                                | [10]             |
| S@SPPC                          | 1386/0.1C                                    | 4.4                                    | 150        | 4.8                              | [11]             |
| S/3DOM ZnO                      | 1110/0.2C                                    | 4.5                                    | 100        | 5                                | [12]             |
| <b>S/Ni(OH)<sub>2</sub>@CNT</b> | <b>1146/0.2C</b>                             | <b>4.6</b>                             | <b>100</b> | <b>6.5</b>                       | <b>This work</b> |

## References

1. Hu, G.J.; Sun, Z.H.; Shi, C.; Fang, R.P.; Chen, J.; Hou, P.X.; Liu, C.; Cheng, H.M.; Li, F. A Sulfur-Rich Copolymer@CNT Hybrid Cathode with Dual-Confinement of Polysulfides for High-Performance Lithium-Sulfur Batteries. *Adv. Mater.* **2017**, *29*, 1603835.
2. Song, Z.C.; Lu, X.L.; Li, X.Y.; Jiang, N.; Huo, Y.; Zheng, Q.J.; Lin, D.M. Tailored multifunctional hybrid cathode substrate configured with carbon nanotube-modified polar  $\text{Co}(\text{PO}_3)_2/\text{CoP}$  nanoparticles embedded nitrogen-doped porous-shell carbon polyhedron for high-performance lithium-sulfur batteries. *J. Colloid Interface Sci.* **2020**, *575*, 220–230.
3. He, J.R.; Bhargava, A.; Yaghoobnejad Asl, H.; Chen, Y.F.; Manthiram, A.  $1\text{T}'\text{-ReS}_2$  Nanosheets In Situ Grown on Carbon Nanotubes as a Highly Efficient Polysulfide Electrocatalyst for Stable Li-S Batteries. *Adv. Energy Mater.* **2020**, *10*, 2001017.
4. Liu, X.; Wang, S.; Wang, A.L.; Wang, Z.N.; Chen, J.; Zeng, Q.H.; Chen, P.P.; Liu, W.; Li, Z.X.; Zhang, L.Y., A new cathode material synthesized by a thiol-modified metal-organic framework (MOF) covalently connecting sulfur for superior long-cycling stability in lithium-sulfur batteries. *J. Mater. Chem. A* **2019**, *7*, 24515–24523.
5. Niu, X.Q.; Wang, X.L.; Wang, D.H.; Li, Y.; Zhang, Y.J.; Zhang, Y.D.; Yang, T.; Yu, T.; Tu, J.P. Metal hydroxide - a new stabilizer for the construction of sulfur/carbon composites as high-performance cathode materials for lithium-sulfur batteries. *J. Mater. Chem. A* **2015**, *3*, 17106–17112.
6. Hwang, J.-Y.; Kim, H.M.; Shin, S.; Sun, Y.-K. Designing a High-Performance Lithium-Sulfur Batteries Based on Layered Double Hydroxides-Carbon Nanotubes Composite Cathode and a Dual-Functional Graphene-Polypropylene- $\text{Al}_2\text{O}_3$  Separator. *Adv. Funct. Mater.* **2018**, *28*, 1704294.
7. Wu, Y.Q.; Luo, Z.X.; Wang, X.R.; Fu, G.L.; Lei, W.X.; Zou, Y.L.; Yin, B.B.; Ma, Z.S.; Pan, Y.; Jiang, W.J. Cotton-like CNTs/(Ni-P)/S composites with enhanced electrochemical performance of lithium-sulfur battery. *Mater. Res. Bull.* **2022**, *145*, 111529.
8. Tong, Z.M.; Huang, L.; Guo, J.Y.; Gao, Y.; Zhang, H.J.; Jia, Q.L.; Luo, D.; Lei, W.; Zhang, S.W. Simultaneously achieving fast sulfur redox kinetics and high-loading in lithium-sulfur batteries. *Carbon* **2022**, *187*, 451–461.
9. Chen, J.S.; Liu, Y.; Liu, Z.K.; Chen, Y.; Zhang, C.G.; Yin, Y.N.; Yang, Q.L.; Shi, Z.Q.; Xiong, C.X. Carbon nanofibril composites with high sulfur loading fabricated from nanocellulose for high-performance lithium-sulfur batteries. *Colloid. Surface. A* **2020**, *603*, 125249.
10. Li, H.; Liu, D.; Zhu, X.X.; Qu, D.Y.; Xie, Z.Z.; Li, J.S.; Tang, H.L.; Zheng, D.; Qu, D.Y. Integrated 3D electrodes based on metal-nitrogen-doped graphitic ordered mesoporous carbon and carbon paper for high-loading lithium-sulfur batteries. *Nano Energy* **2020**, *73*, 104763.
11. Zhao, T.Q.; Tan, X.H.; Song, L.T.; Guo, L.M.; Liu, Y.L.; Kang, X.H.; Meng, X.M.; Wang, H.F.; Chu, W.G. Up-Scalable Conversion of White-Waste Polystyrene Foams to Sulfur, Phosphorus-Codoped Porous Carbon for High-Performance Lithium-Sulfur Batteries. *ACS Appl. Energy Mater.* **2020**, *3*, 9369–9378.
12. Han, H.S.; Wang, T.; Zhang, Y.G.; Nurpeissova, A.; Bakenov, Z. Three-Dimensionally Ordered Macroporous  $\text{ZnO}$  Framework as Dual-Functional Sulfur Host for High-Efficiency Lithium-Sulfur Batteries. *Nanomaterials* **2020**, *10*, 2267.
